# Supplementary material for: Changes in Fault Slip Potential Due to Water Injection in the Rongcheng Deep Geothermal Reservoir, Xiong’an New Area, North China
Source: MDPI journal article supplement (doi:10.3390/w14030410), 2022-01-29
Supplement: s1 [file s1]

**Supplementary Materials:** The following supporting information can be downloaded at: [www.mdpi.com/xxx/s1](http://www.mdpi.com/xxx/s1).

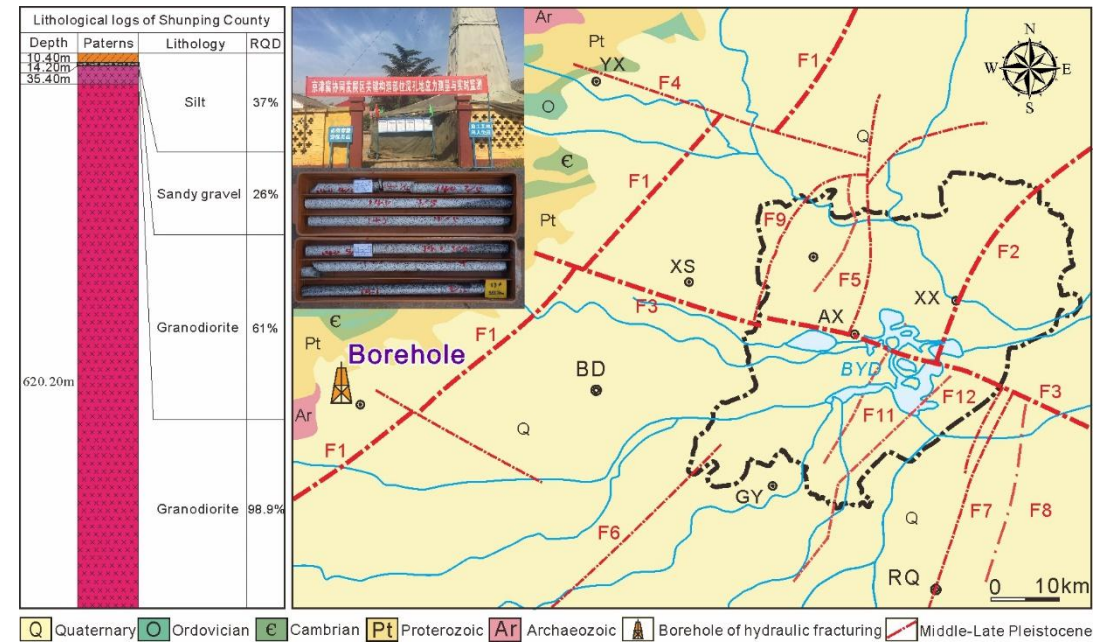

**Figure S1.** In-situ stress measured borehole in Shunping county of Hebei province and the lithological logs. The Middle-Late Pleistocene active faults: F1: Baoding-Shijiazhuang Fault, F2: Niudong Fault, F3: Xushui-Dacheng Fault, F4: Dingxing Fault, F5 and F9: The Boundary Fault of Rongcheng uplift, F6: Gaoyang-Boye Fault, F7: Renqiu Fault, F8: Maxi Fault, F10: an unnamed Secondary Fault, F11: Chu'an Fault, F12: Renxi Fault. Cities: YX: Yixian, RQ: Renqiu, XS: Xushui, AX: An'xin, XX: Xiongxin, BD: Baoding, GY: Gaoyang. River: BYD: Baiyangdian.

**Table S1.** Results hydraulic fracturing in situ stress measurements in Shunping county of Hebei province \*.

| Depth/m | $P_b$ /MPa | $P_r$ /MPa | $P_s$ /MPa | $\sigma_H$ /MPa | $\sigma_h$ /MPa | $\sigma_v$ /MPa | $P_0$ /MPa |
|---------|------------|------------|------------|-----------------|-----------------|-----------------|------------|
| 88.00   | 22.20      | 14.24      | 9.40       | 13.23           | 9.40            | 2.33            | 0.73       |
| 97.00   | 34.12      | 19.06      | 11.36      | 14.20           | 11.36           | 2.57            | 0.82       |
| 111.00  | 22.65      | 13.39      | 9.28       | 13.49           | 9.28            | 2.94            | 0.96       |
| 176.00  | 25.54      | 15.19      | 10.91      | 15.93           | 10.91           | 4.66            | 1.61       |
| 205.00  | 29.40      | 19.81      | 12.63      | 16.18           | 12.63           | 5.43            | 1.90       |
| 226.00  | 31.92      | 20.19      | 13.53      | 18.29           | 13.53           | 5.99            | 2.11       |
| 257.00  | 25.92      | 19.38      | 11.75      | 13.45           | 11.75           | 6.81            | 2.42       |
| 286.00  | 32.08      | 19.16      | 12.36      | 15.21           | 12.36           | 7.58            | 2.71       |
| 324.00  | 30.10      | 18.66      | 12.43      | 15.54           | 12.43           | 8.59            | 3.09       |
| 367.00  | 30.08      | 17.79      | 12.48      | 16.13           | 12.48           | 9.73            | 3.52       |
| 391.00  | 34.36      | 21.01      | 15.06      | 20.41           | 15.06           | 10.36           | 3.76       |
| 432.50  | 33.49      | 21.54      | 15.35      | 20.33           | 15.35           | 11.46           | 4.18       |
| 495.00  | 36.30      | 20.68      | 15.49      | 20.99           | 15.49           | 13.12           | 4.80       |
| 567.00  | 33.22      | 21.45      | 16.07      | 21.24           | 16.07           | 15.03           | 5.52       |
| 586.00  | 33.45      | 24.59      | 19.73      | 28.89           | 19.73           | 15.53           | 5.71       |
| 604.00  | 33.51      | 22.89      | 19.40      | 29.42           | 19.40           | 16.01           | 5.89       |

\* Being noted that:  $P_b$ ,  $P_r$ , and  $P_s$  denote the breakdown, reopening and shut-in pressure, respectively.  $\sigma_H$ ,  $\sigma_h$  and  $\sigma_v$  denote the maximum, minimum horizontal and vertical principal stresses, respectively.  $P_0$  is the natural pore pressure.
